# Supplementary material for: Risk and prognosis of Staphylococcus aureus bacteremia among individuals with and without end-stage renal disease: a Danish, population-based cohort study
Source: PubMed Central journal article supplement (PMC4296555; doi:10.1186/s12879-014-0740-8), 2015-01-08
Supplement: 12879_2014_740_MOESM1_ESM.pdf [file 12879_2014_740_MOESM1_ESM.pdf]

**Additional file 1.** Incidence rate of first episode of SAB according to type of renal replacement therapy

| <b>Renal replacement therapy mode</b> | <b>Incidence rate</b>                         |                                              | <b>Incidence rate ratio</b>          |
|---------------------------------------|-----------------------------------------------|----------------------------------------------|--------------------------------------|
|                                       | <b>First calendar period (year 1992-1996)</b> | <b>Last calendar period (year 2007-2009)</b> | <b>First vs last calendar period</b> |
| Transplant recipients                 | 53.2 <sup>1</sup> (28.3–90.9)                 | 4.5 <sup>1</sup> (0.9–13.1)                  | 0.08 (0.02-0.30)                     |
| Hemodialysis patients                 | 98.8 <sup>1</sup> (84.4–114.4)                | 38.1 <sup>1</sup> (33.5–43.2)                | 0.39 (0.32-0.47)                     |
| Peritoneal dialysis patients          | 44.2 <sup>1</sup> (34.0-56.6)                 | 18.4 <sup>1</sup> (14.5–23.1)                | 0.42 (0.30-0.58)                     |

**NOTE.**

<sup>1</sup>Per 1,000 person years follow up
